# Chromatin Structure Regulates Gene Conversion

W. Jason Cummings<sup>1</sup>, Munehisa Yabuki<sup>1</sup>, Ellen C. Ordinario<sup>2</sup>, David W. Bednarski<sup>1</sup>, Simon Quay<sup>1</sup>, Nancy Maizels<sup>1,2\*</sup>

**1** Department of Immunology, University of Washington School of Medicine, Seattle, Washington, United States of America, **2** Department of Biochemistry, University of Washington School of Medicine, Seattle, Washington, United States of America

**Homology-directed repair is a powerful mechanism for maintaining and altering genomic structure. We asked how chromatin structure contributes to the use of homologous sequences as donors for repair using the chicken B cell line DT40 as a model. In DT40, immunoglobulin genes undergo regulated sequence diversification by gene conversion templated by pseudogene donors. We found that the immunoglobulin V $\lambda$  pseudogene array is characterized by histone modifications associated with active chromatin. We directly demonstrated the importance of chromatin structure for gene conversion, using a regulatable experimental system in which the heterochromatin protein HP1 (*Drosophila melanogaster* Su[var]205), expressed as a fusion to *Escherichia coli* lactose repressor, is tethered to polymerized lactose operators integrated within the pseudo-V $\lambda$  donor array. Tethered HP1 diminished histone acetylation within the pseudo-V $\lambda$  array, and altered the outcome of V $\lambda$  diversification, so that nontemplated mutations rather than templated mutations predominated. Thus, chromatin structure regulates homology-directed repair. These results suggest that histone modifications may contribute to maintaining genomic stability by preventing recombination between repetitive sequences.**

Citation: Cummings WJ, Yabuki M, Ordinario EC, Bednarski DW, Quay S, et al. (2007) Chromatin structure regulates gene conversion. PLoS Biol 5(10): e246. doi:10.1371/journal.pbio.0050246

## Introduction

Homologous recombination provides a pathway for restoring or altering DNA sequence and structure [1–7]. Homologous recombination can recreate the original DNA sequence at a DNA break, and predominates in S/G2 phases of cell cycle, when sister chromatids can serve as donors for faithful repair [8,9]. Homologous recombination can also have a mutagenic outcome by promoting recombination between nonallelic repeated sequences, leading to genomic instability, or by templating repair from a homolog rather than a sister chromatid, leading to loss of heterozygosity (LOH). In a living cell, multiple pathways compete to repair the same kinds of damage. For example, double-strand breaks (DSBs) can be repaired by nonhomologous end-joining, which may be accompanied by sequence loss or translocation [5,10,11]. Nicks can be efficiently repaired in situ, or by short- or long-patch repair pathways that use the complementary strand as a template [12,13].

Chromatin structure plays an important role in repair at the site of DNA damage. A critical signal for DSB repair is C-terminal phosphorylation of the variant histone H2AX by ATM and ATR, to generate  $\gamma$ -H2AX [14–16].  $\gamma$ -H2AX is recruited to the break and extends over a large region surrounding the break site, creating a boundary of modified chromatin, and recruits the cohesin complex to sites of damage, to promote DSB repair using the sister chromatid as a template [17,18].  $\gamma$ -H2AX alerts DNA damage checkpoints, and is recognized by histone acetyltransferases and chromatin remodeling complexes [19–22]. Changes in chromatin structure also facilitate synapsis of severed DNA ends for nonhomologous end-joining [23].

Homologous recombination involves two DNA molecules, the recipient, which is the site of the DNA lesion, and the donor. Two lines of evidence suggest that donor chromatin

structure may contribute to homologous recombination. At the yeast mating type locus, changes in histone acetylation occur at the donor locus that are distinct from those at or near the DNA break [24]. In human cells, transcription of a donor promotes its use in gene conversion [25]. However, the role of donor chromatin structure in regulating recombination has not been directly tested in vertebrate cells.

Immunoglobulin (Ig) gene diversification in chicken B cells provides a powerful model for studying homologous recombination. Chickens have a limited number of functional heavy and light chain variable (V) regions, which undergo V(D)J recombination early in B cell development [26,27]. The rearranged V genes then undergo sequence diversification by gene conversion, using an array of homeologous upstream pseudo-V ( $\psi$ V) regions as donors (Figure 1A). The  $\psi$ V regions are nonfunctional, as they lack promoters and cannot be transcribed. The mechanism of Ig gene conversion is readily studied in the DT40 cell line, which derives from a bursal lymphoma and constitutively diversifies its Ig heavy and Ig light chain (IgL) genes by gene conversion [28–30]. DT40 also supports very high levels of homologous gene targeting,

**Academic Editor:** James E. Haber, Brandeis University, United States of America

**Received** March 26, 2007; **Accepted** July 17, 2007; **Published** September 18, 2007

**Copyright:** © 2007 Cummings et al. This is an open-access article distributed under the terms of the Creative Commons Attribution License, which permits unrestricted use, distribution, and reproduction in any medium, provided the original author and source are credited.

**Abbreviations:**  $\psi$ V, pseudo-variable; Ach3, acetylated histone H3; Ach4, acetylated histone H4; ChIP, chromatin immunoprecipitation; diMeK4(H3), histone H3 dimethylated at lysine 4; DSB, double-strand break; GFP, green fluorescent protein; Ig, immunoglobulin; Ig $\lambda$ , immunoglobulin light chain; IPTG, isopropyl- $\beta$ -D-thiogalactoside; LOH, loss of heterozygosity; PolyLacO, polymerized lactose operator; sIgM, surface immunoglobulin M; V, variable

\* To whom correspondence should be addressed. E-mail: maizels@u.washington.edu

## Author Summary

Homologous recombination promotes genetic exchange between regions containing identical or highly related sequences. This is useful in repairing damaged DNA, or in reassorting genes in meiosis, but uncontrolled homologous recombination can create genomic instability. Chromosomes are made up of a complex of DNA and protein, called chromatin. DNA within chromatin is packed tightly in order to fit the entire genome inside a cell; but chromatin structure may become relaxed to allow access to enzymes that regulate gene expression, transcribe genes into messenger RNA, or carry out gene replication. We asked if chromatin packing regulates homologous recombination. To do this, we tethered a factor associated with compact chromatin, called HP1, adjacent to an immunoglobulin gene locus at which homologous recombination occurs constitutively, in order to produce a diverse repertoire of antibodies. We found that the compact, repressive chromatin structure produced by HP1 prevents homologous recombination. This finding suggests that regulated changes in chromatin structure may contribute to maintaining genomic stability by preventing recombination between repetitive sequences.

thought to reflect elevated expression or activity of factors that promote recombinational repair [31–33].

Ig gene conversion in DT40 depends upon ubiquitous and conserved factors. The substrate for repair is a nick produced by successive action of three factors. The B-cell-specific enzyme activation-induced deaminase (AID) [34–37] deaminates cytosine to uracil in transcribed and targeted genes [38–41]; uracil DNA glycosylase excises the uracil produced by

AID to generate an abasic site [42–46]; and the MRE11 abasic lyase, functioning within the MRE11/RAD50/NBS1 complex, nicks at the abasic site [47,48]. Strand transfer and new DNA synthesis are carried out by ubiquitous DNA repair factors including the RAD51 paralogs, BRCA2, FANCC, FANCD2, and  $\text{pol}\eta$  [49–55]. Deficiencies in some of these factors, particularly the RAD51 paralogs, or targeted deletion of some or all of the  $\psi V$  donors [56], impair gene conversion and can contribute to a shift in the processing of AID-initiated breaks so that templated repair is accompanied or even supplanted by nontemplated mutagenesis.  $\psi V$  regions preferentially used as donors are in opposite orientation to the functional V region, suggesting that local chromosomal architecture may guide templated repair [57]. However, nothing is known about how epigenetic features of the donors affect recombination.

To understand how donor chromatin structure affects gene conversion in particular, and homologous recombination more generally, we characterized and experimentally manipulated chromatin structure at the Ig $\lambda$  locus in the chicken B cell line DT40. We found that the  $\psi V\lambda$  donors contain acetylated histones, consistent with an open chromatin structure. To test whether this reflects requirements of gene conversion, we tethered HP1 (*Drosophila melanogaster* Su[*var*]205) to the  $\psi V\lambda$  array in a DT40 derivative in which polymerized lactose operator (PolyLacO) has been inserted into that chromosomal region. HP1 is known to promote heterochromatic gene silencing [58–60]. Tethered HP1 caused a local transition of the donor sequences from an

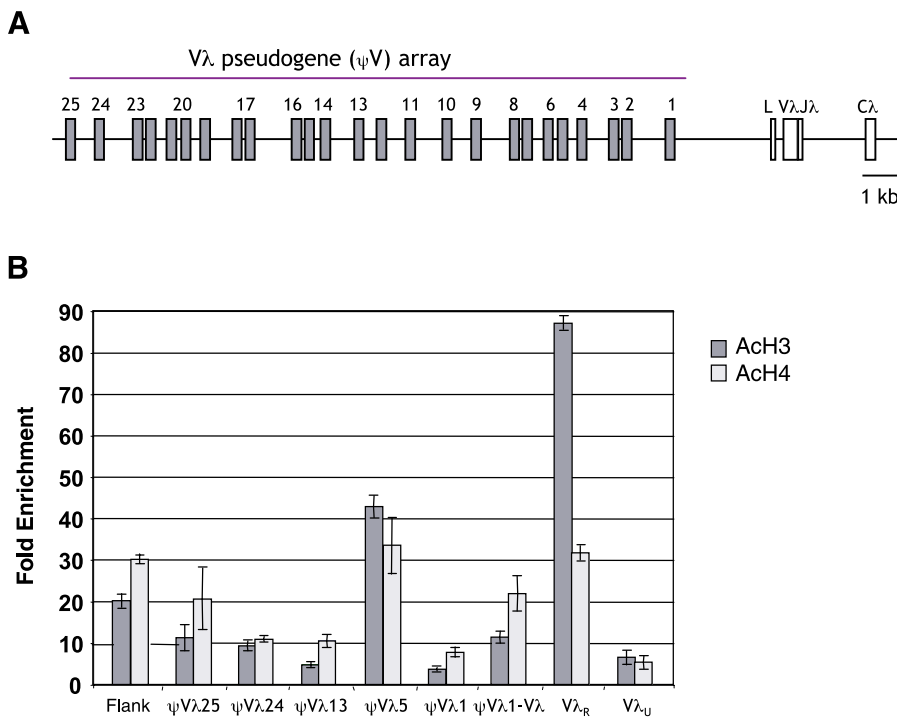

**Figure 1.** Chromatin Modification at the DT40 Ig $\lambda$  Locus

(A) Schematic diagram of the rearranged chicken Ig $\lambda$  locus, showing the 25  $\psi V\lambda$  regions and the rearranged V $\lambda_R$  gene. C $\lambda$ , constant region; L, leader; V $\lambda$ J $\lambda$ , variable region.

(B) Summary of a representative chromatin immunoprecipitation experiment, assaying N-terminal acetylation of histones H3 and H4 (AcH3 and AcH4). Sites interrogated were as follows: a region approximately 1 kb upstream of the  $\psi V\lambda$  array (flank),  $\psi V\lambda.25$ ,  $\psi V\lambda.24$ ,  $\psi V\lambda.13$ ,  $\psi V\lambda.5$ ,  $\psi V\lambda.1$ , the region between  $\psi V\lambda.1$  and V $\lambda$ , and the rearranged V $\lambda_R$  and unrearranged V $\lambda_U$  alleles. See Materials and Methods for details. Bars indicate standard deviation. doi:10.1371/journal.pbio.0050246.g001

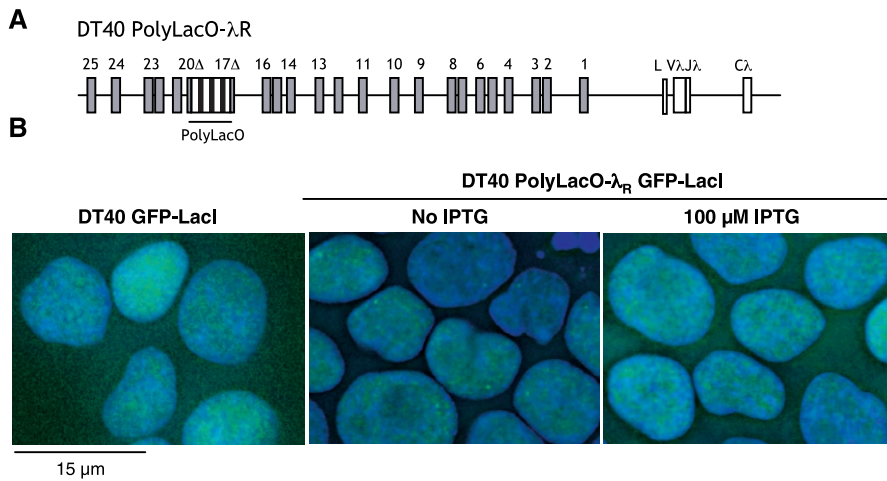

**Figure 2.** Reversible Tethering of GFP-LacI to the  $\psi V\lambda$  Array in DT40 PolyLacO- $\lambda_R$

(A) Schematic diagram of the rearranged chicken Ig $\lambda$  locus in DT40, with PolyLacO inserted between  $\psi V\lambda 17$  and  $\psi V\lambda 20$ . Notations as in Figure 1. (B) Fluorescent images of DT40 GFP-LacI transfectants and DT40 PolyLacO- $V\lambda_R$  GFP-LacI transfectants cultured in the absence of IPTG (center) or in the presence of 100  $\mu$ M IPTG overnight (right). doi:10.1371/journal.pbio.0050246.g002

open to a nonpermissive state, and a switch from templated to nontemplated diversification, evident as point mutations. These observations demonstrate that permissive chromatin structure at the donor is a key regulator of gene conversion, and that nonpermissive chromatin structure can prevent homologous recombination and result in point mutagenesis. These results have implications for our understanding of homologous recombination and of the mechanisms that promote LOH, leading to tumorigenesis and nonallelic recombination between repeats. These results should also inform design of donor constructs for targeted gene therapy.

## Results

### Permissive Chromatin Structure at $V\lambda$ and $\psi V\lambda$ Donor Templates

In DT40 B cells, the  $V\lambda$  gene is rearranged and expressed at one Ig $\lambda$  allele, but it is unrearranged at the other allele. We characterized chromatin structure at the rearranged ( $V\lambda_R$ ) and unrearranged ( $V\lambda_U$ ) alleles and the  $\psi V\lambda$  array by chromatin immunoprecipitation (ChIP). ChIP was carried out with antibodies specific for lysine acetylation at the N-termini of histones H3 and H4. Recovered DNA was amplified in duplex PCR reactions; recovery was normalized to an amplicon from the *ovalbumin* (*Ova*) gene, which is not expressed in B cells; and enrichment was normalized to a total DNA input control (see Materials and Methods for details). The distinct genomic structure of  $V\lambda_R$  and  $V\lambda_U$  permit them to be distinguished by PCR with specific primers. ChIP demonstrated considerable enrichment of acetylated histones H3 and H4 (AcH3 and AcH4) at the rearranged  $V\lambda_R$  gene. In a typical experiment, AcH3 was enriched more than 80-fold at  $V\lambda_R$ , and AcH4 more than 30-fold (Figure 1B). In contrast, at the  $V\lambda_U$  allele, the levels of AcH3 and AcH4 were much lower than at  $V\lambda_R$  (16-fold and 7-fold lower, respectively), and only a few fold enriched relative to input DNA.

Chromatin structure within the  $\psi V\lambda$  array was assayed by amplification with primers that interrogated seven sites,

including a region between  $\psi V\lambda 1$  and the  $V\lambda$  gene,  $\psi V\lambda 1$ ,  $\psi V\lambda 5$ ,  $\psi V\lambda 13$ ,  $\psi V\lambda 18$ ,  $\psi V\lambda 24$ ,  $\psi V\lambda 25$ , and the upstream flanking region. (Because of a paucity of polymorphisms, the  $\psi V\lambda$  arrays at the two Ig $\lambda$  alleles in DT40 cannot be readily distinguished by PCR.) Strikingly, we observed considerable enrichment of AcH3 and AcH4 throughout the  $\psi V\lambda$  array (Figure 1B). Enrichment was not proportional to distance from the transcribed  $V\lambda_R$  gene, as sites distant from  $V\lambda_R$  did not consistently display lower levels of enrichment than proximal sites (Figure 1B). Thus, enrichment of acetylated histones within the  $\psi V\lambda$  array does not simply represent a graded spreading of chromatin modification from the transcribed  $V\lambda_R$  gene to sites upstream. The nonuniform chromatin structure of the locus suggests the presence of *cis*-elements that regulate chromatin structure at the  $\psi V\lambda$  array.

### Reversible Tethering of Lactose Repressor Fusion Proteins to the $\psi V\lambda$ Array in DT40 PolyLacO- $\lambda_R$

Local modification of chromatin structure can be achieved by tethering regulators to DNA binding sites as appropriate fusion proteins. This strategy has, for example, been used to show that the heterochromatin protein HP1, expressed as a fusion with *Escherichia coli* lactose repressor (LacI-HP1), promotes a closed chromatin structure and inactivation of reporter genes neighboring a LacO repeat in *Drosophila* [61,62], and to show that tethering of the vertebrate G9a histone methyltransferase to a GAL4 binding site within V(D)J minigene reporter impairs nonhomologous-mediated recombination of that construct [63]. Our laboratory has recently constructed a cell line, DT40 PolyLacO- $\lambda_R$ , that is a DT40 derivative in which PolyLacO has been inserted by homologous gene targeting between  $\psi V\lambda 17$  and  $\psi V\lambda 20$ , 17 kb upstream of the transcribed  $V\lambda_R$  (Figure 2A; M. Yabuki, E. C. Ordinario, W. J. Cummings, R. P. Larson, M. M. Fujii, et al., unpublished data). The PolyLacO insert is 3.8 kb in length and composed of approximately 100 copies of a 20-mer operator [64]. Using this cell line, it is possible to assay the effects of tethered regulatory factors on homologous recom-

bination in a physiological process within an endogenous locus, avoiding the need for a transgene reporter. Control experiments have shown that the PolyLacO tag does not affect cell proliferation, cell cycle, or Ig gene diversification (M. Yabuki, E. C. Ordinario, W. J. Cummings, R. P. Larson, M. M. Fujii, et al., unpublished data).

In DT40 PolyLacO- $\lambda_R$  GFP-LacI cells, which stably express enhanced green fluorescent protein (GFP) fused to LacI (GFP-LacI), the tagged  $\lambda_R$  allele can be directly imaged by fluorescence microscopy and appears as a distinct dot in each cell (Figure 2B, center). Tethering is reversible, as bright dots are not evident following overnight culture with 100  $\mu$ M isopropyl- $\beta$ -D-thiogalactoside (IPTG), which prevents LacI from binding to PolyLacO (Figure 2B, right).

### Tethered HP1 Diminishes Modifications Characteristic of Active Chromatin at $\psi V\lambda$

To manipulate chromatin structure at the  $\psi V\lambda$  array, we generated stable transfectants of DT40 PolyLacO- $\lambda_R$  that express the *D. melanogaster* HP1 protein fused to LacI (LacI-HP1). HP1 is a nonhistone heterochromatin protein that functions in heterochromatic gene silencing, the spreading of heterochromatin, and histone deacetylation [58–60]. Tethered HP1 has been shown to promote a closed chromatin structure at adjacent genes [61,62,65–67]. Staining DT40 PolyLacO- $\lambda_R$  LacI-HP1 transfectants with anti-LacI antibodies showed that LacI-HP1 colocalized with DAPI-dense regions corresponding to pericentric heterochromatin (Figure 3A), behaving as a functional marker of heterochromatin [68].

To ask if tethered LacI-HP1 altered chromatin structure, we assayed chromatin modifications at  $\psi V\lambda 17$ . This is the only site in the  $\psi V\lambda$  array at which the rearranged and unrearranged alleles could be readily distinguished by use of specific PCR primers. Following ChIP, DNA was amplified with PCR primers specific for the targeted rearranged allele ( $\psi V\lambda 17_R$ ). Enrichment of  $\psi V\lambda 17_R$  was compared to the nonexpressed *Ova* gene as an internal control, and normalized to the  $\psi V\lambda 17_R:Ova$  enrichment ratio in total input DNA (see Material and Methods). AcH3 and AcH4 were enriched 2.2-fold and 5.9-fold, respectively, at  $\psi V\lambda 17_R$  in DT40 PolyLacO- $\lambda_R$  GFP-LacI controls (Figure 3B and 3C). These levels of enrichment are comparable to those documented in DT40 (Figure 1B). (Note that analysis of modification at  $\psi V\lambda$  in the survey of the parental DT40 line necessarily included both alleles, which may underestimate activating modifications at the rearranged allele. In contrast, analysis of modifications at  $\psi V\lambda 17_R$  interrogates only the active allele.) AcH3 and AcH4 were not enriched at  $\psi V\lambda 17_R$  in DT40 PolyLacO- $\lambda_R$  LacI-HP1 transfectants (0.6- and 1.0-fold, respectively; Figure 3B and 3C), consistent with HP1-mediated silencing. HP1 can effect silencing by recruitment of a histone methyltransferase that modifies lysine 9 of histone H3 [65–67], but may also promote silencing independently of this modification [61]. ChIP using antibodies against either di- and trimethylated H3 (lysine 9) did not reveal clear enrichment of the H3 lysine 9 methylation modification (data not shown). Dimethylation of lysine 4 of histone H3 (diMeK4[H3]) is associated with transcription and generally exhibits an overlapping distribution with acetylation [69,70]. Assays of diMeK4(H3) at  $\psi V\lambda 17_R$  demonstrated that this modification was 18.9-fold enriched in DT40

PolyLacO- $\lambda_R$  GFP-LacI cells, but at background levels in DT40 PolyLacO- $\lambda_R$  LacI-HP1 cells (Figure 3B and 3C).

HP1 promotes maintenance and spreading of heterochromatin [65]. To verify that changes in chromatin structure promoted by tethered HP1 did not spread throughout the chromosome, we examined another site near the Ig $\lambda$  locus on Chromosome 15, the gene encoding the catalytic subunit of DNA pol $\epsilon$ . DNA pol $\epsilon$  is ubiquitously expressed and essential for chromosomal replication in eukaryotes [71], and it is encoded by a gene mapping approximately 2.1 Mb from Ig $\lambda$ . We found no difference in enrichment of AcH3 at the *pole* promoter region in the DT40 PolyLacO- $\lambda_R$  LacI-HP1 transfectants relative to DT40 PolyLacO- $\lambda_R$  GFP-LacI controls (*pole/Ova* enrichment 8.5-fold and 8.4-fold, respectively; Figure 3C). Similarly, there was no difference in AcH4 at the *pole* promoter in the DT40 PolyLacO- $\lambda_R$  LacI-HP1 transfectants relative to DT40 PolyLacO- $\lambda_R$  GFP-LacI controls (*pole/Ova* enrichment 1.9-fold and 1.7-fold, respectively; Figure 3C). Thus, tethering of LacI-HP1 at  $\psi V\lambda$  caused local modifications in chromatin structure, diminishing the AcH3, AcH4, and diMeK4(H3) modifications characteristic of open chromatin at  $\psi V\lambda 17_R$ , and causing chromatin to adopt a less permissive state.

### Tethered HP1 Does Not Affect $V\lambda$ Gene Expression

We asked how tethered HP1 affected AcH3 and AcH4 levels at the expressed  $V\lambda_R$  by comparing these modifications in DT40 PolyLacO- $\lambda_R$  LacI-HP1 cells and the DT40 PolyLacO- $\lambda_R$  GFP-LacI control transfectants (Figure 4A). Tethered HP1 diminished AcH3 and AcH4 levels to approximately 40% and 20% of the control levels, respectively. To ask if this affected gene expression, we assayed both surface IgM (sIgM) expression and  $V\lambda$  transcript levels. Staining cells with mouse anti-chicken IgM showed that sIgM expression was comparable in DT40 PolyLacO- $\lambda_R$  GFP-LacI and DT40 PolyLacO- $\lambda_R$  LacI-HP1 lines, cultured in either the presence or absence of IPTG (Figure 4B).  $V\lambda$  transcript levels were assayed in RNA harvested from DT40 PolyLacO- $\lambda_R$  GFP-LacI and DT40 PolyLacO- $\lambda_R$  LacI-HP1 cells, and normalized to  $\beta$ -actin as a control (Figure 4C). No significant difference was observed between  $V\lambda$  transcript levels in the two cell lines, demonstrating that transcription is not affected by tethering of HP1 within the  $\psi V\lambda$  array. Thus tethered LacI-HP1 did not affect expression of the downstream Ig gene, although it did diminish AcH3 and AcH4 levels at  $V\lambda_R$ . The very high AcH3 and AcH4 levels characteristic of  $V\lambda$  (Figures 1B and 4A) are therefore not essential to maintain high levels of gene expression.

### Tethered HP1 Alters Local Chromatin Structure

To assess how extensive the chromatin effects of LacI-HP1 were, we examined AcH3 and AcH4 levels throughout the Ig $\lambda$  locus at the same amplicons examined in Figure 1, including one in the flank, six in the  $\psi V\lambda$  array, and one at the expressed  $V\lambda$ . Levels of modification were determined by comparing  $\psi V\lambda 17_R:Ova$  ratios of immunoprecipitated and input conditions, as in Figure 3B. AcH3 modifications at the sites surveyed ranged from 24% to 63% of the levels at the same sites in the controls (Figure 5A, dark bars), and the average level of H3 acetylation across all of the sites was 38% of the DT40 PolyLacO- $\lambda_R$  GFP-LacI control. Culture of DT40 PolyLacO- $\lambda_R$  LacI-HP1 transfectants for 3 d with 250  $\mu$ M

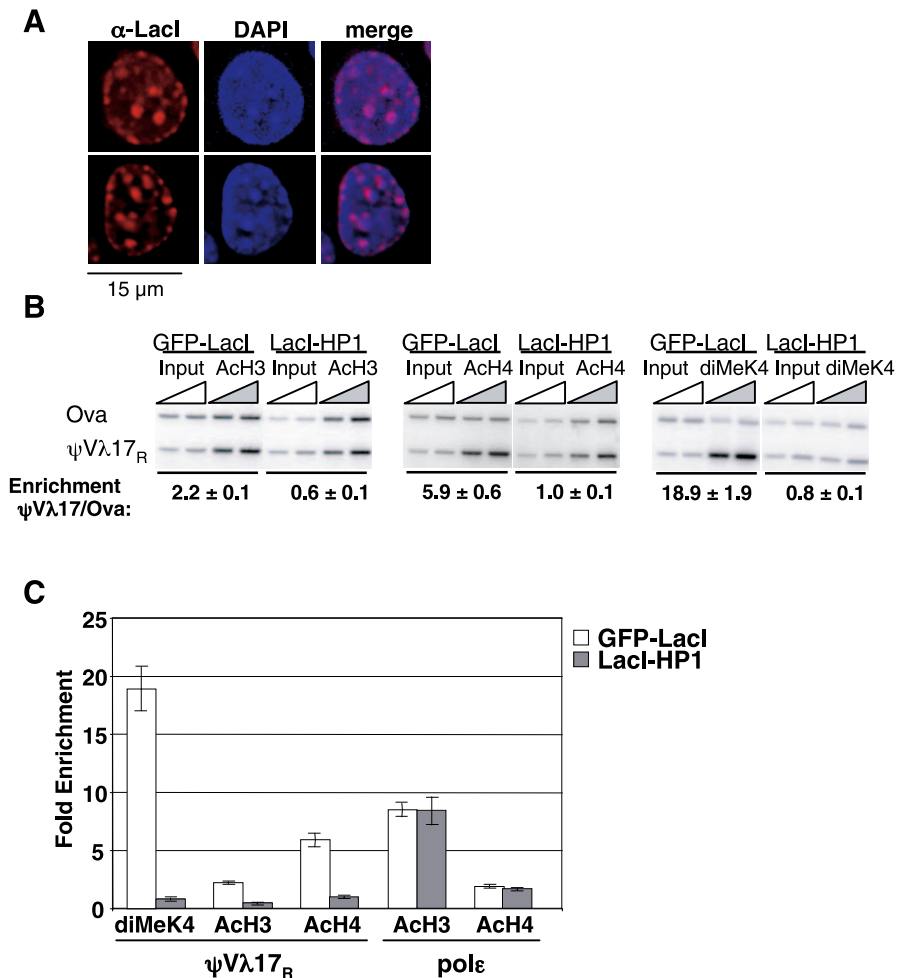

**Figure 3.** Tethered HP1 Diminishes Modifications Characteristic of Active Chromatin

(A) Representative fluorescent images of single DT40 PolyLacO- $V\lambda_R$  LacI-HP1 transfectants, stained with anti-LacI antibodies (left), DAPI (center), or merged image (right).

(B) Enrichment of ACh3 and ACh4 at  $\psi V\lambda 17_R$  in DT40 PolyLacO- $V\lambda_R$  GFP-LacI and DT40 PolyLacO- $V\lambda_R$  LacI-HP1 transfectants. Following ChIP, duplex PCR was carried out with Ova and  $\psi V\lambda 17_R$  primers. Enrichment is expressed relative to the total DNA input control  $\pm$  standard deviation of four separate amplifications of increasing amounts of template DNA.

(C) Histogram showing enrichment of ACh3 and ACh4 at  $\psi V\lambda 17_R$  (from [B]) and the *pole* promoter in DT40 PolyLacO- $V\lambda_R$  GFP-LacI and DT40 PolyLacO- $V\lambda_R$  LacI-HP1 transfectants. Bars indicate standard deviation.

doi:10.1371/journal.pbio.0050246.g003

IPTG increased acetylation of H3 at all eight sites surveyed (Figure 5A, compare dark and light bars). The effects of IPTG culture were somewhat variable, but at most sites IPTG culture restored levels of ACh3 to at least 45% of the level in the DT40 PolyLacO- $\lambda_R$  GFP-LacI control cells, with an average of over 80%. Thus, the chromatin modifications at  $\psi V\lambda 17_R$  in DT40 PolyLacO- $\lambda_R$  LacI-HP1 cells resulted directly from tethered LacI-HP1, and were largely reversible.

H4 acetylation was surveyed at the same eight sites (Figure 5B, dark bars). ACh4 modifications were found to range from 18% to 42% of control levels, and the average level was 29% of that of the control cell line. Culture with IPTG for 3 d increased acetylation of H4 at all eight sites surveyed (Figure 5B, compare dark and light bars), restoring H4 acetylation to at least 57% of the level in the DT40 PolyLacO- $\lambda_R$  GFP-LacI control cells, with an average of over 80%. Moreover, IPTG can at least partially reverse the effects of LacI-HP1.

These results show that the observed chromatin modifications in the  $\psi V\lambda$  array are due to tethering of HP1. Moreover,

the fact that these modifications are reversible shows that an active mechanism reverses histone modifications imposed by tethering chromatin modification factors at  $\psi V\lambda$ .

### Tethered HP1 Impairs Templated Mutagenesis

The ability to manipulate chromatin structure at  $\psi V\lambda$  by tethering LacI-HP1 (Figures 3–5) enabled us to directly ask whether and how chromatin structure influences Ig gene conversion. We used the sIgM loss variant assay to determine if tethered LacI-HP1 affected the clonal rate of sequence diversification of the rearranged  $V\lambda_R$  gene. This fluctuation assay measures the fraction of variant cells that no longer express structurally intact sIgM, and thus scores mutation events resulting from either gene conversion or point mutagenesis [47,50]. Independent clonal derivatives of DT40 PolyLacO- $\lambda_R$  GFP-LacI and DT40 PolyLacO- $\lambda_R$  LacI-HP1 were established by limiting dilution cloning of sIgM<sup>+</sup> cells; the fraction of sIgM<sup>-</sup> cells in each population was determined by flow cytometry of cells cultured for 4 wk and then stained

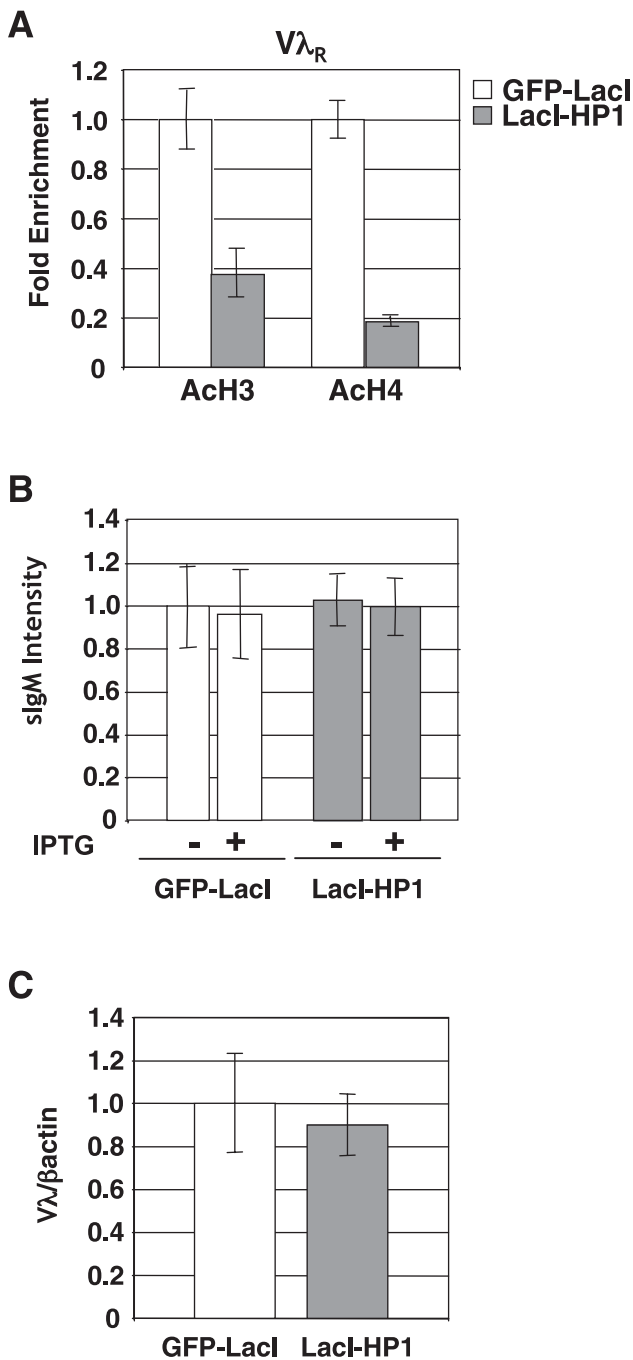

**Figure 4.** Tethered HP1 Does Not Affect Igλ Expression

(A) Relative enrichment of ACh3 and ACh4 at Vλ<sub>R</sub> in DT40 PolyLacO-Vλ<sub>R</sub> GFP-LacI and DT40 PolyLacO-Vλ<sub>R</sub> LacI-HP1 transfectants. Enrichment values were normalized to the DT40 PolyLacO-Vλ<sub>R</sub> GFP-LacI control. Bars indicate standard deviation of four separate amplifications of increasing amounts of template DNA.

(B) Relative intensity of sIgM expression in DT40 PolyLacO-λ<sub>R</sub> GFP-LacI and DT40 PolyLacO-λ<sub>R</sub> LacI-HP1 transfectants cultured in the presence or absence of 250 μM IPTG. sIgM levels were quantitated by measuring intensity of staining with mouse anti-chicken IgM antibody, and normalized to the level in DT40 PolyLacO-λ<sub>R</sub> GFP-LacI transfectants. Details as in (A).

(C) Relative levels of Vλ<sub>R</sub> transcripts in DT40 PolyLacO-λ<sub>R</sub> GFP-LacI and DT40 PolyLacO-λ<sub>R</sub> LacI-HP1 transfectants. Transcript levels were quantitated by reverse transcriptase-PCR and normalized to the level in DT40 PolyLacO-λ<sub>R</sub> GFP-LacI transfectants. Details as in (A).

doi:10.1371/journal.pbio.0050246.g004

with anti-IgM antibody. The median sIgM loss rate was 0.5% for DT40 PolyLacO-λ<sub>R</sub> GFP-LacI cells and 2.8% for DT40 PolyLacO-λ<sub>R</sub> LacI-HP1 cells (Figure 6A). This corresponds to a 5.6-fold acceleration of clonal diversification rates in LacI-HP1 transfectants relative to GFP-LacI controls.

Ig gene diversification in chicken B cells occurs predominantly by gene conversion (templated mutation), but if gene conversion is impaired, for example by the absence of essential factors, repair can create a significant fraction of nontemplated mutations [50–55]. This is typically accompanied by an increase in the clonal diversification rate, because the ψVλ templates for gene conversion are about 80% identical to the rearranged gene, and a significant fraction of DNA lesions that are repaired by gene conversion do not undergo any alteration of sequence; in contrast, repair by a mutagenic polymerase is more likely to alter DNA sequence. To determine how tethering of HP1 accelerated diversification, we sorted single sIgM<sup>+</sup> cells from the DT40 PolyLacO-λ<sub>R</sub> GFP-LacI and DT40 PolyLacO-λ<sub>R</sub> LacI-HP1 transfectants, amplified expressed Vλ regions by single-cell PCR, and sequenced these regions. Sequence changes were categorized as templated if they were within a tract containing two or more base changes and the tract was an exact match to at least 9 bp of a donor ψVλ sequence, and as ambiguous if they consisted of only a single base change while matching at least 9 bp of a donor ψVλ sequence. Nontemplated events, consisting of point mutations, deletions, and insertions, were also scored. In the control DT40 PolyLacO-λ<sub>R</sub> GFP-LacI transfectants, 55 templated events and two ambiguous events were documented among 71 mutations; thus, most events (77%) were templated, and a small fraction of events (20%) were point mutations (Figure 6B, left; Figure S1A). Strikingly, in DT40 PolyLacO-λ<sub>R</sub> LacI-HP1 cells, point mutations predominated (58%), accompanied by deletions (8%) and insertions (14%), while only one clearly templated event and six ambiguous events were documented among 36 mutations (Figure 6B, right; Figure S1B). Thus, only 3% of mutations were clearly templated, and even including the ambiguous class of potentially templated mutations, templating could account for no more than 19% of mutation. Statistical comparisons showed that the difference between the fraction of clearly templated mutations in DT40 PolyLacO-λ<sub>R</sub> GFP-LacI control cells and DT40 PolyLacO-λ<sub>R</sub> LacI-HP1 transfectants (77% compared to 3%) was highly significant ( $p = 7.5 \times 10^{-7}$ , Fisher's exact test). The difference in the fraction of ambiguous, potentially templated mutations in the control cells (3%) and HP1 transfectants (17%) is also significant ( $p = 0.05$ , Fisher's exact test). This suggests that some mutations in this category may arise as a result of limitations on the length of a gene conversion tract imposed by nonpermissive donor chromatin. Thus, tethering of HP1 accelerated clonal rates of mutagenesis by impairing templated mutation.

## Discussion

Gene conversion at the chicken Ig loci uses an array of upstream ψV donors as templates for homology-directed repair of lesions targeted to the rearranged and transcribed V genes. We have shown that in chicken B cells carrying out active Ig gene conversion, chromatin within the donor ψVλ array is characterized by enrichment of ACh3 and ACh4, modifications that correlate with an open chromatin struc-

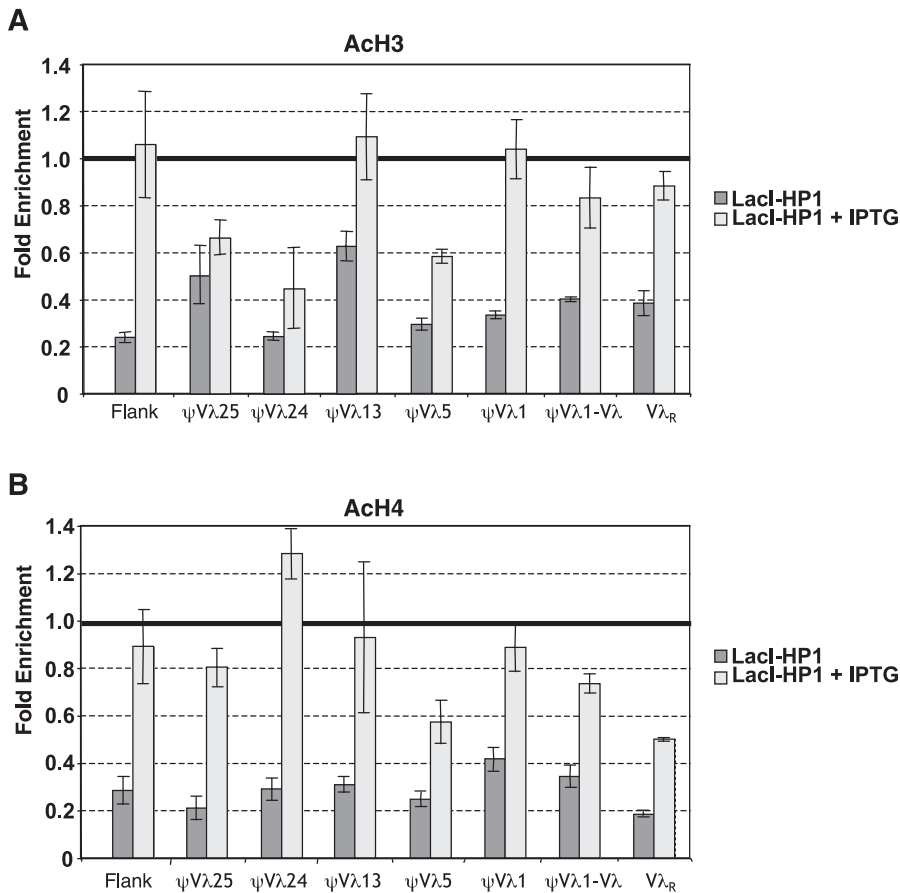

**Figure 5.** Tethered HP1 Decreases Histone Acetylation throughout the  $\psi V\lambda$  Array

(A) Summary of a ChIP experiment, assaying N-terminal acetylation of histone H3 in chromatin from the DT40 PolyLacO- $V\lambda_R$  LacI-HP1 cell line cultured for 3 d in the presence or absence of 250  $\mu$ M IPTG. ChIP enrichment values (see Material and Methods) were normalized to values obtained from a parallel analysis of chromatin from DT40 PolyLacO- $V\lambda_R$  GFP-LacI cells. Bars indicate standard deviation of four separate amplifications of increasing amounts of template DNA.

(B) Summary of a ChIP experiment, assaying N-terminal acetylation of histone H4 in chromatin from the DT40 PolyLacO- $V\lambda_R$  LacI-HP1 cell line cultured for 3 d in the presence or absence of 250  $\mu$ M IPTG. Details as in (A).

doi:10.1371/journal.pbio.0050246.g005

ture. We directly demonstrated the importance of permissive chromatin structure for Ig gene conversion by showing that tethering the heterochromatin protein HP1 to the  $\psi V\lambda$  donor array caused local changes in chromatin structure, diminishing the AcH3, AcH4, and diMeK4(H3) modifications characteristic of open chromatin. Although these changes were not accompanied by the lysine 9 methylation (H3) modification characteristic of closed chromatin, they caused the region to adopt a state less permissive for gene conversion. Tethering of HP1 was accompanied by a dramatic shift in the Ig  $V\lambda$  mutation spectrum, so that templated mutations were in the minority and point mutations predominated. Importantly, this effect on mutagenesis was correlated with a change in chromatin structure and not changes in expression of the locus. Thus, chromatin structure can dictate whether gene conversion occurs at an endogenously generated DNA lesion.

### The Mechanism of Gene Conversion within a Complex Chromatin Landscape

Gene conversion at  $V\lambda$  results from priming of new DNA synthesis at the 3' end of a break using a  $\psi V\lambda$  region as template. Gene conversion requires synapsis between the

donor and recipient DNA, as well as access to the donor by factors that carry out homology-directed repair. The elevated levels of H3 and H4 acetylation characteristic of the  $\psi V\lambda$  array in wild-type DT40 are evidence of a relaxed chromatin structure, which would increase the accessibility of the  $\psi V\lambda$  genes to *trans*-acting factors and also create a three-dimensional architecture that is favorable for sequence synapsis.

HP1 tethered within the  $\psi V\lambda$  donor array impaired gene conversion at the rearranged  $V\lambda_R$ , without affecting  $V\lambda$  gene expression. Chromatin changes caused by tethered HP1 may impair gene conversion by impeding access of repair factors and the invading strand to the donor template. Tethered HP1 may also contribute to larger chromosomal architecture that affects the mechanics of DNA repair pathways, such as looping necessary to juxtapose donor and recipient sequences. The point mutations that accumulated in LacI-HP1 transfectants are typical of thwarted recombinational repair, and are characteristic of cells lacking either *trans*-acting factors essential for recombination [49–55] or some or all of the  $\psi V$  donor array [56]. HP1 regulates chromatin structure and heterochromatic gene silencing in two ways, by partnering with a histone methyltransferase [65] and by recruiting

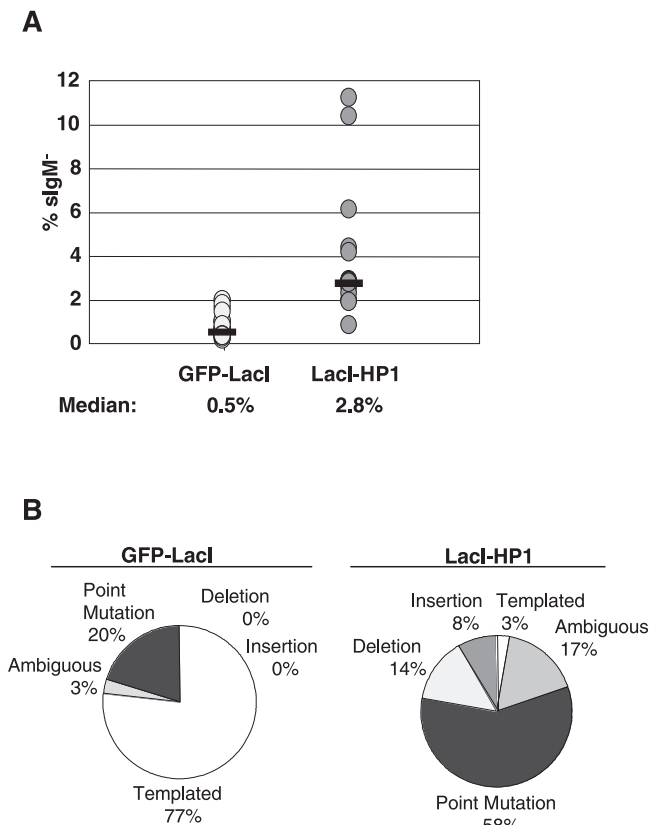

**Figure 6.** Nontemplated and Templated Mutation Promoted by Tethered HP1

(A) sIgM loss fluctuation assay of panels of independent DT40 PolyLacO- $V\lambda_R$  GFP-LacI ( $n = 27$ ) and DT40 PolyLacO- $V\lambda_R$  LacI-HP1 ( $n = 16$ ). The figure shows combined data from at least two independent transfectants for each fusion construct. Median diversification rates are shown below. (B) Summary of sequence analysis of  $V\lambda$  regions carrying unique mutations from DT40 PolyLacO- $V\lambda_R$  GFP-LacI ( $n = 71$ ) and DT40 PolyLacO- $V\lambda_R$  LacI-HP1 ( $n = 36$ ) transfectants, as analyzed by single-cell PCR. Sequences were pooled from two independent transfectants. doi:10.1371/journal.pbio.0050246.g006

histone deacetylases [60]. Tethered HP1 caused modification changes characteristic of a nonpermissive chromatin structure within  $\psi V\lambda$ .

Histone acetylation has been documented at actively transcribed mammalian Ig genes undergoing somatic hypermutation and class switch recombination, but whether hyperacetylation contributes to targeting of diversification has yet to be resolved [72–76]. A connection between histone acetylation and gene conversion was suggested by experiments showing that treatment of DT40 cells with the histone deacetylase inhibitor trichostatin A promotes genome-wide histone deacetylation accompanied by increased gene conversion at  $V\lambda_R$  [77]. However, the interpretation of those results is complicated by the fact that the effects of trichostatin A are genome-wide, and not specific. The DT40 PolyLacO- $\lambda_R$  cell line permits local manipulation of chromatin structure, avoiding that complication. Moreover, we were able to demonstrate that the effects of tethering a LacI-HP1 fusion protein were largely reversed upon culture with IPTG, so an active mechanism must determine chromatin modification at  $\psi V\lambda$ . For studies of homologous recombination, the DT40 PolyLacO- $\lambda_R$  B cell line has the further advantage that

Ig gene conversion is a physiological process within an endogenous locus, avoiding the need for a transgene reporter.

### Chromatin Structure, Genome Stability, Aging, and Gene Therapy

The importance of chromatin structure to the outcome of homologous recombination has implications for understanding the mechanisms that normally maintain genomic stability. There are vast numbers of repetitive elements distributed throughout the vertebrate genome, and recombination between these elements can lead to genomic instability [78]. In the human genome, there are approximately one million Alu elements, and recombination between Alu elements can cause duplications leading to tumorigenesis and genetic disease [79,80]. Histones carrying repressive modifications are enriched at repetitive elements [81]. These modifications undoubtedly maintain transcriptional repression; our results suggest they may also contribute to suppression of recombination.

LOH occurs as a result of unequal mitotic recombination between homologs at allelic sites. The mechanism of LOH is of particular interest, because it contributes to loss of tumor suppressor gene function, leading to tumorigenesis [82]. Recent experiments have demonstrated an age-dependent increase in LOH in *Saccharomyces cerevisiae* [83] and in reporter genes in *Drosophila* germ cells [84], and an increase in homologous recombination in mouse pancreatic cells [85]. Mechanisms proposed to explain age-associated LOH include elevated rates of DNA damage, changes in the cell cycle distribution, and inactivation of homology-independent repair pathways with aging. Our results suggest another possibility, that relaxation of chromatin structure may accompany aging and promote a genome-wide increase in homologous recombination in aging cells. This possibility is supported by recent analysis of *Drosophila* [86], as well as by recent evidence that the mutant form lamin A polypeptide (product of the human *LMNA* gene) responsible for Hutchinson-Gilford progeria syndrome leads to a genome-wide loss of H3 methylation [87].

The finding that chromatin structure regulates homologous recombination also has practical ramifications. Considerable current effort is directed toward developing strategies that harness a cell's capacity for homology-dependent repair to promote gene therapy, by providing an intact donor gene to replace a deficient target gene [88]. Our results suggest that permissive structure at the donor will be an important design parameter in developing donor genes for therapeutic applications.

### Materials and Methods

**Chromatin immunoprecipitation.** ChIP was carried out as previously described [48,89]. For all experiments at least two chromatin preparations from at least two independent stably transfected lines were analyzed. Figures present one representative experiment in which results from analysis of four separate amplifications were used to calculate a standard deviation. Enrichment of the experimental amplicon was normalized to enrichment of an internal control amplicon from the *Ova* gene, amplified in the same tube by duplex PCR, and enrichment upon ChIP with specific antibodies was normalized to parallel experiments in which ChIP was carried out with total input DNA controls. Inclusion of the *Ova* internal control amplicon enabled us to normalize for immunoprecipitation efficiency, background carryover, and differences in gel loading.



Enrichment equaled  $[(\psi V\lambda/Ova)_{Ab}]/[(\psi V\lambda/Ova)_{input}]$ . As an additional control, the ratio of the experimental and control amplicons in the total input control was compared to a control ChIP with polyspecific IgG; in all cases, enrichment in input and IgG controls were essentially equal.

Antibodies used were as follows: anti-Ach3 (06–599), anti-Ach4 (06–866), and diMeK4(H3) (07–030) from Upstate (<http://www.upstate.com>). PCR primers for ChIP were as follows:  $V\lambda_R$ , 5'-GCCGTCACTGATTGCCGTTTTCTCCCCTC-3' and 5'-CGAGACGAGGTCAGCGACTCACCTAGGAC-3'; region between  $\psi V\lambda 1$  and  $V\lambda$ , 5'-CTGTGGCCTGTCAGTGCTTA-3' and 5'-GCAGGGAACCACAAGAACAT-3';  $\psi V\lambda 1$ , 5'-GGGACTGTGTCCACCAGGAT-3' and 5'-CGCAGTCAACATGTGGAATATC-3';  $\psi V\lambda 5$ , 5'-GAGCCCCATTTCTCTCTC-3' and 5'-GAGATGTGCAGCAACAAGGA-3';  $\psi V\lambda 13$ , 5'-CCCTCTCCCTATGCAGGTTTC-3' and 5'-CCGCTATCACCATACAGGA-3';  $\psi V\lambda 18$ , 5'-CCATTTCTCCCCTCTCTCC-3' and 5'-TCAACCTACAGCTTCAGTGC-3';  $\psi V\lambda 24$ , 5'-CCATTTCTCCCCTCTCTCC-3' and 5'-CAGCCCATCACGCCCTCTTA-3';  $\psi V\lambda 25$ , 5'-TCTGTTGGTTTCAGCACAGC-3' and 5'-GCAGTCTGTGGGATGAGGT-3';  $\psi V\lambda$  upstream flank, 5'-GGCTCCTGTAGCTGATCCTG-3' and 5'-GTTCTTTGCTTTCGGTTGC-3';  $\psi V\lambda 17$  at the PolyLacO-targeted allele, 5'-TAGATAGGATAAACAGGGTAATAGC-3' and 5'-AGGGCTGTACTCAGTTTAC-3'; *Ova*, 5'-ATTGCGCATGTTATCCACA-3' and 5'-TAAGCCCTGCCAGTTCTCAT-3'; and *pole*, 5'-GGGCTGGCTCATCAACAT-3' and 5'-CTGGGTGGCCACATAGAAGT-3'.

**Constructs, transfection, and cell culture.** The LacI-HP1 expression plasmid was created by substituting LacI-HP1 from a construct provided by L. Wallrath (University of Iowa) for AID in pAIDPuro (from H. Arakawa, Munich, Germany), to position LacI-HP1 downstream of the chicken  $\beta$ -actin promoter. The GFP-LacI expression plasmid (p3'ss-EGFP-LacI) was provided by A. Belmont (University of Illinois). Cell culture and transfection were carried out as previously described [47]. DT40 PolyLacO- $\lambda_R$  was generated by homologous gene targeting, using a construct carrying approximately 3.8 kb of PolyLacO flanked by arms designed for targeting the region between  $\psi V\lambda 17$  and  $\psi V\lambda 20$ , 17 kb upstream of the transcribed  $V\lambda_R$  (M. Yabuki, E. C. Ordinario, W. J. Cummings, R. P. Larson, M. M. Fujii, et al., unpublished data). In brief, homologous integrants were identified by PCR, and the selectable marker deleted by Cre expression. The DT40 bursal lymphoma derives from B cells in which only one Ig $\lambda$  allele is rearranged, and in which the two parental chromosomes are distinguished by a polymorphism near  $\psi V\lambda 17$ . This enabled us to determine whether the rearranged or unrearranged allele had been targeted by PCR. Control experiments established that cell cycle distribution was comparable in DT40 PolyLacO- $\lambda_R$ , DT40 PolyLacO- $\lambda_R$  GFP-LacI, and DT40 PolyLacO- $\lambda_R$  LacI-HP1 cells, and that culture of cells with up to 500  $\mu$ M IPTG for 7 d did not affect proliferation rate or chromatin modifications at  $\psi V\lambda 17_R$  in DT40 PolyLacO- $\lambda_R$  GFP-LacI control cells. Oligonucleotides for  $V\lambda$  sequence analysis have been described [47].

**Fluorescence imaging.** For fluorescence imaging, cells ( $2 \times 10^5$ ) were cytospun onto glass slides and fixed with 2% paraformaldehyde for 20 min, permeabilized with 0.1% NP-40 for 15 min, and stained as previously described [90]. Primary staining was with an anti-LacI monoclonal antibody (1:500 dilution; Upstate), and the secondary antibody was donkey anti-mouse IgG Alexa Fluor 594 (1:2,000; Molecular Probes, <http://probes.invitrogen.com>). To visualize the nucleus, cells were stained with DAPI (Sigma-Aldrich, <http://www.sigmaaldrich.com>). Fluorescent images were acquired using the

DeltaVision microscopy system (Applied Precision, <http://www.appliedprecision.com>) and processed with softWoRx software (Applied Precision).

**Reverse transcriptase-PCR.** RNA was harvested from cells using TRIzol Reagent (Invitrogen, <http://www.invitrogen.com>), purified with a PreAnalytiX column (Qiagen, <http://www1.qiagen.com>), and subject to one round of reverse transcription prior to PCR.  $V\lambda$  transcripts were PCR-amplified following dilution of the template (1:1,300), and  $\beta$ -actin was PCR-amplified from an undiluted sample. The primers for amplification of  $V\lambda$  were 5'-GTCAGCAAACCCAGGAGAAAC-3' and 5'-AATCCACAGTCACTGGGCTG-3'. The primers for amplification of  $\beta$ -actin have been described [36].

**Quantitation of sIgM loss variants and sequence analysis.** The sIgM loss variant assay, which measures the accumulated sIgM loss variants resulting from frameshift or nonsense mutations in mutated V regions, was used to quantitate Ig V region diversification [47,50]. In brief, sIgM<sup>+</sup> cells were isolated by flow cytometry followed by limiting dilution cloning, and expanded for 4 wk. To quantitate the fraction of sIgM<sup>+</sup> cells, approximately  $1 \times 10^6$  cells were stained with anti-chicken IgM-RPE (SouthernBiotech, <http://www.southernbiotech.com>) and analyzed on a FACScan with CellQuest software (BD Biosciences, <http://www.bdbiosciences.com>).

Single-cell PCR and sequence analysis were performed as described [47]. In brief, sIgM<sup>+</sup> cells were sorted and aliquoted to single wells,  $V\lambda$  regions were amplified and sequenced, and their sequences were compared to those of the  $\psi V\lambda$  donors to determine if mutations were templated or nontemplated. The criterion for a templated mutation was that nine consecutive bases must be an exact match in donor and recipient. Sequences were derived from two independently transfected lines. Only unique sequences were included for classification of the mutations.

## Supporting Information

**Figure S1.** Sequence Alignment of Mutated DT40 PolyLacO- $\lambda_R$  GFP-LacI and DT40 PolyLacO- $\lambda_R$  LacI-HP1 Clones

Sequences of unique, mutated  $V\lambda$  regions from diversified (A) DT40 PolyLacO- $\lambda_R$  GFP-LacI and (B) DT40 PolyLacO- $\lambda_R$  LacI-HP1 cells. Clear blue boxes outline gene conversion tracts; red circles denote point mutations; black dotted boxes indicate nontemplated insertions; orange triangles denote deletions; blue-shaded boxes indicate ambiguous changes.

Found at doi:10.1371/journal.pbio.0050246.sg001 (83 KB PDF).

## Acknowledgments

We thank Andrew Belmont (University of Illinois) for providing p3'ss-EGFP, Lori Wallrath (University of Iowa) for providing the LacI-HP1 construct, and Masayuki Sekimata and all members of the Maizels laboratory for discussions.

**Author contributions.** WJC conceived and designed the experiments. WJC, MY, ECO, DWB, and SQ performed the experiments. WJC, MY, and NM contributed reagents/materials/analysis tools. WJC and NM analyzed the data and wrote the paper.

**Funding.** This work was supported by US National Institutes of Health grants R01 GM41712 and P01 CA77852.

**Competing interests.** The authors have declared that no competing interests exist.

## References

- West SC (2003) Molecular views of recombination proteins and their control. *Nat Rev Mol Cell Biol* 4: 435–445.
- Lee GS, Neiditch MB, Salus SS, Roth DB (2004) RAG proteins shepherd double-strand breaks to a specific pathway, suppressing error-prone repair, but RAG nicking initiates homologous recombination. *Cell* 117: 171–184.
- Essers J, Houtsmuller AB, Kanaar R (2006) Analysis of DNA recombination and repair proteins in living cells by photobleaching microscopy. *Methods Enzymol* 408: 463–485.
- Wyman C, Kanaar R (2006) DNA double-strand break repair: All's well that ends well. *Annu Rev Genet* 40: 363–383.
- Weinstock DM, Richardson CA, Elliott B, Jasin M (2006) Modeling oncogenic translocations: Distinct roles for double-strand break repair pathways in translocation formation in mammalian cells. *DNA Repair (Amst)* 5: 1065–1074.
- Sugawara N, Haber JE (2006) Repair of DNA double strand breaks: In vivo biochemistry. *Methods Enzymol* 408: 416–429.

- Brugmans L, Kanaar R, Essers J (2007) Analysis of DNA double-strand break repair pathways in mice. *Mutat Res* 614: 95–108.
- Garber PM, Vidanes GM, Toczyski DP (2005) Damage in transition. *Trends Biochem Sci* 30: 63–66.
- Rodrigue A, Lafrance M, Gauthier MC, McDonald D, Hendzel M, et al. (2006) Interplay between human DNA repair proteins at a unique double-strand break in vivo. *EMBO J* 25: 222–231.
- Haber JE (2000) Partners and pathways repairing a double-strand break. *Trends Genet* 16: 259–264.
- Rooney S, Chaudhuri J, Alt FW (2004) The role of the non-homologous end-joining pathway in lymphocyte development. *Immunol Rev* 200: 115–131.
- Caldecott KW (2003) XRCC1 and DNA strand break repair. *DNA Repair (Amst)* 2: 955–969.
- Sung JS, Demple B (2006) Roles of base excision repair subpathways in correcting oxidized abasic sites in DNA. *FEBS J* 273: 1620–1629.
- Rogakou EP, Pilch DR, Orr AH, Ivanova VS, Bonner WM (1998) DNA

- double-stranded breaks induce histone H2AX phosphorylation on serine 139. *J Biol Chem* 273: 5858–5868.
15. Burma S, Chen BP, Murphy M, Kurimasa A, Chen DJ (2001) ATM phosphorylates histone H2AX in response to DNA double-strand breaks. *J Biol Chem* 276: 42462–42467.
  16. Ward IM, Chen J (2001) Histone H2AX is phosphorylated in an ATR-dependent manner in response to replicational stress. *J Biol Chem* 276: 47759–47762.
  17. Rogakou EP, Boon C, Redon C, Bonner WM (1999) Megabase chromatin domains involved in DNA double-strand breaks in vivo. *J Cell Biol* 146: 905–916.
  18. Unal E, Arbel-Eden A, Sattler U, Shroff R, Lichten M, et al. (2004) DNA damage response pathway uses histone modification to assemble a double-strand break-specific cohesin domain. *Mol Cell* 16: 991–1002.
  19. Paull TT, Rogakou EP, Yamazaki V, Kirchgessner CU, Gellert M, et al. (2000) A critical role for histone H2AX in recruitment of repair factors to nuclear foci after DNA damage. *Curr Biol* 10: 886–895.
  20. van Attekum H, Fritsch O, Hohn B, Gasser SM (2004) Recruitment of the INO80 complex by H2A phosphorylation links ATP-dependent chromatin remodeling with DNA double-strand break repair. *Cell* 119: 777–788.
  21. Morrison AJ, Highland J, Krogan NJ, Arbel-Eden A, Greenblatt JF, et al. (2004) INO80 and gamma-H2AX interaction links ATP-dependent chromatin remodeling to DNA damage repair. *Cell* 119: 767–775.
  22. Downs JA, Allard S, Jobin-Robitaille O, Javaheri A, Auger A, et al. (2004) Binding of chromatin-modifying activities to phosphorylated histone H2A at DNA damage sites. *Mol Cell* 16: 979–990.
  23. Jazayeri A, McAnish AD, Jackson SP (2004) *Saccharomyces cerevisiae* Sin3p facilitates DNA double-strand break repair. *Proc Natl Acad Sci U S A* 101: 1644–1649.
  24. Tamburini BA, Tyler JK (2005) Localized histone acetylation and deacetylation triggered by the homologous recombination pathway of double-strand DNA repair. *Mol Cell Biol* 25: 4903–4913.
  25. Schildkraut E, Miller CA, Nickoloff JA (2006) Transcription of a donor enhances its use during double-strand break-induced gene conversion in human cells. *Mol Cell Biol* 26: 3098–3105.
  26. Arakawa H, Buerstedde JM (2004) Immunoglobulin gene conversion: Insights from bursal B cells and the DT40 cell line. *Dev Dyn* 229: 458–464.
  27. Maizels N (2005) Immunoglobulin gene diversification. *Annu Rev Genet* 39: 23–46.
  28. Thompson CB, Neiman PE (1987) Somatic diversification of the chicken immunoglobulin light chain gene is limited to the rearranged variable gene segment. *Cell* 48: 369–378.
  29. Reynaud CA, Anquez V, Grimal H, Weill JC (1987) A hyperconversion mechanism generates the chicken light chain preimmune repertoire. *Cell* 48: 379–388.
  30. Reynaud CA, Dahan A, Anquez V, Weill JC (1989) Somatic hyperconversion diversifies the single V<sub>H</sub> gene of the chicken with a high incidence in the D region. *Cell* 59: 171–183.
  31. Buerstedde JM, Arakawa H, Watahiki A, Carninci PP, Hayashizaki YY, et al. (2002) The DT40 web site: Sampling and connecting the genes of a B cell line. *Nucleic Acids Res* 30: 230–231.
  32. Yamazoe M, Sonoda E, Hochegger H, Takeda S (2004) Reverse genetic studies of the DNA damage response in the chicken B lymphocyte line DT40. *DNA Repair (Amst)* 3: 1175–1185.
  33. Sale JE (2004) Immunoglobulin diversification in DT40: A model for vertebrate DNA damage tolerance. *DNA Repair (Amst)* 3: 693–702.
  34. Muramatsu M, Kinoshita K, Fagarasan S, Yamada S, Shinkai Y, et al. (2000) Class switch recombination and hypermutation require activation-induced cytidine deaminase (AID), a potential RNA editing enzyme. *Cell* 102: 553–563.
  35. Revy P, Muto T, Levy Y, Geissmann F, Plebani A, et al. (2000) Activation-induced cytidine deaminase (AID) deficiency causes the autosomal recessive form of the Hyper-IgM syndrome (HIGM2). *Cell* 102: 565–575.
  36. Arakawa H, Hauschild J, Buerstedde JM (2002) Requirement of the activation-induced deaminase (AID) gene for immunoglobulin gene conversion. *Science* 295: 1301–1306.
  37. Harris RS, Sale JE, Petersen-Mahrt SK, Neuberger MS (2002) AID is essential for immunoglobulin V gene conversion in a cultured B cell line. *Curr Biol* 12: 435–438.
  38. Petersen-Mahrt SK, Harris RS, Neuberger MS (2002) AID mutates *E. coli* suggesting a DNA deamination mechanism for antibody diversification. *Nature* 418: 99–103.
  39. Bransteitter R, Pham P, Scharff MD, Goodman MF (2003) Activation-induced cytidine deaminase deaminates deoxycytidine on single-stranded DNA but requires the action of RNase. *Proc Natl Acad Sci U S A* 100: 4102–4107.
  40. Chaudhuri J, Tian M, Khuong C, Chua K, Pinaud E, et al. (2003) Transcription-targeted DNA deamination by the AID antibody diversification enzyme. *Nature* 422: 726–730.
  41. Ramiro AR, Stavropoulos P, Jankovic M, Nussenzweig MC (2003) Transcription enhances AID-mediated cytidine deamination by exposing single-stranded DNA on the nontemplate strand. *Nat Immunol* 4: 452–456.
  42. Di Noia J, Neuberger MS (2002) Altering the pathway of immunoglobulin hypermutation by inhibiting uracil-DNA glycosylase. *Nature* 419: 43–48.
  43. Rada C, Williams GT, Nilsen H, Barnes DE, Lindahl T, et al. (2002) Immunoglobulin isotype switching is inhibited and somatic hypermutation perturbed in UNG-deficient mice. *Curr Biol* 12: 1748–1755.
  44. Imai K, Slupphaug G, Lee WI, Revy P, Nonoyama S, et al. (2003) Human uracil-DNA glycosylase deficiency associated with profoundly impaired immunoglobulin class-switch recombination. *Nat Immunol* 4: 1023–1028.
  45. Di Noia JM, Neuberger MS (2004) Immunoglobulin gene conversion in chicken DT40 cells largely proceeds through an abasic site intermediate generated by excision of the uracil produced by AID-mediated deoxycytidine deamination. *Eur J Immunol* 34: 504–508.
  46. Saribasak H, Saribasak N, Ipek F, Ellwart J, Arakawa H, et al. (2006) Uracil DNA glycosylase disruption blocks Ig gene conversion and induces transition mutations. *J Immunol* 176: 365–371.
  47. Yabuki M, Fujii MM, Maizels N (2005) The MRE11-RAD50-NBS1 complex accelerates somatic hypermutation and gene conversion of immunoglobulin variable regions. *Nat Immunol* 6: 730–736.
  48. Larson ED, Cummings WJ, Bednarski DW, Maizels N (2005) MRE11/RAD50 cleaves DNA in the AID/UNG-dependent pathway of immunoglobulin gene diversification. *Mol Cell* 20: 367–375.
  49. Takata M, Sasaki MS, Sonoda E, Fukushima T, Morrison C, et al. (2000) The Rad51 paralogs Rad51B and Rad51C promote homologous recombination. *Mol Cell Biol* 20: 6476–6482.
  50. Sale JE, Calandrini DM, Takata M, Takeda S, Neuberger MS (2001) Ablation of XRCC2/3 transforms immunoglobulin V gene conversion into somatic hypermutation. *Nature* 412: 921–926.
  51. Niedzwiedz W, Mosedale G, Johnson M, Ong CY, Pace P, et al. (2004) The Fanconi anaemia gene FANCC promotes homologous recombination and error-prone DNA repair. *Mol Cell* 15: 607–620.
  52. Hatanaka A, Yamazoe M, Sale JE, Takata M, Yamamoto K, et al. (2005) Similar effects of Brca2 truncation and Rad51 paralogs deficiency on immunoglobulin V gene diversification in DT40 cells support an early role for Rad51 paralogs in homologous recombination. *Mol Cell Biol* 25: 1124–1134.
  53. Yamamoto K, Hirano S, Ishiai M, Morishima K, Kitao H, et al. (2005) Fanconi anemia protein FANCD2 promotes immunoglobulin gene conversion and DNA repair through a mechanism related to homologous recombination. *Mol Cell Biol* 25: 34–43.
  54. McIlwraith M, McIlwraith M, Vaisman A, Liu Y, Fanning E, et al. (2005) Human DNA polymerase eta promotes DNA synthesis from strand invasion intermediates of homologous recombination. *Mol Cell* 20: 783–792.
  55. Kawamoto T, Araki K, Sonoda E, Yamashita YM, Harada K, et al. (2005) Dual roles for DNA polymerase eta in homologous DNA recombination and translesion DNA synthesis. *Mol Cell* 20: 793–799.
  56. Arakawa H, Saribasak H, Buerstedde JM (2004) Activation-induced cytidine deaminase initiates immunoglobulin gene conversion and hypermutation by a common intermediate. *PLoS Biol* 2: e179.
  57. McCormack WT, Thompson CB (1990) Chicken IgL variable region gene conversions display pseudogene donor preference and 5' to 3' polarity. *Genes Dev* 4: 548–558.
  58. James TC, Eissenberg JC, Craig C, Dietrich V, Hobson A, et al. (1989) Distribution patterns of HPI1, a heterochromatin-associated nonhistone chromosomal protein of *Drosophila*. *Eur J Cell Biol* 50: 170–180.
  59. Eissenberg JC, James TC, Foster-Hartnett DM, Hartnett T, Ngan V, et al. (1990) Mutation in a heterochromatin-specific chromosomal protein is associated with suppression of position-effect variegation in *Drosophila melanogaster*. *Proc Natl Acad Sci U S A* 87: 9923–9927.
  60. Nielsen AL, Ortiz JA, You J, Oulad-Abdelghani M, Khechumian R, et al. (1999) Interaction with members of the heterochromatin protein 1 (HP1) family and histone deacetylation are differentially involved in transcriptional silencing by members of the TIF1 family. *EMBO J* 18: 6385–6395.
  61. Li Y, Danzer JR, Alvarez P, Belmont AS, Wallrath LL (2003) Effects of tethering HP1 to euchromatic regions of the *Drosophila* genome. *Development* 130: 1817–1824.
  62. Danzer JR, Wallrath LL (2004) Mechanisms of HP1-mediated gene silencing in *Drosophila*. *Development* 131: 3571–3580.
  63. Osipovich O, Milley R, Meade A, Tachibana M, Shinkai Y, et al. (2004) Targeted inhibition of V(D)J recombination by a histone methyltransferase. *Nat Immunol* 5: 309–316.
  64. Robinett CC, Straight A, Li G, Wilhelm C, Sudlow G, et al. (1996) In vivo localization of DNA sequences and visualization of large-scale chromatin organization using lac operator/repressor recognition. *J Cell Biol* 135: 1685–1700.
  65. Bannister AJ, Zegerman P, Partridge JF, Miska EA, Thomas JO, et al. (2001) Selective recognition of methylated lysine 9 on histone H3 by the HP1 chromo domain. *Nature* 410: 120–124.
  66. Jacobs SA, Taverna SD, Zhang Y, Briggs SD, Li J, et al. (2001) Specificity of the HP1 chromo domain for the methylated N-terminus of histone H3. *EMBO J* 20: 5232–5241.
  67. Lachner M, O'Carroll D, Rea S, Mechtler K, Jenuwein T (2001) Methylation of histone H3 lysine 9 creates a binding site for HP1 proteins. *Nature* 410: 116–120.
  68. Verschure PJ, van der Kraan I, de Leeuw W, van der Vlag J, Carpenter AE, et al. (2005) In vivo HP1 targeting causes large-scale chromatin condensation and enhanced histone lysine methylation. *Mol Cell Biol* 25: 4552–4564.
  69. Strahl BD, Ohba R, Cook RG, Allis CD (1999) Methylation of histone H3 at

- lysine 4 is highly conserved and correlates with transcriptionally active nuclei in *Tetrahymena*. Proc Natl Acad Sci U S A 96: 14967–14972.
70. Litt MD, Simpson M, Gaszner M, Allis CD, Felsenfeld G (2001) Correlation between histone lysine methylation and developmental changes at the chicken beta-globin locus. Science 293: 2453–2455.
  71. Araki H, Ropp PA, Johnson AL, Johnston LH, Morrison A, et al. (1992) DNA polymerase II, the probable homolog of mammalian DNA polymerase epsilon, replicates chromosomal DNA in the yeast *Saccharomyces cerevisiae*. EMBO J 11: 733–740.
  72. Nambu Y, Sugai M, Gonda H, Lee CG, Katakai T, et al. (2003) Transcription-coupled events associating with immunoglobulin switch region chromatin. Science 302: 2137–2140.
  73. Woo CJ, Martin A, Scharff MD (2003) Induction of somatic hypermutation is associated with modifications in immunoglobulin variable region chromatin. Immunity 19: 479–489.
  74. Li Z, Luo Z, Scharff MD (2004) Differential regulation of histone acetylation and generation of mutations in switch regions is associated with Ig class switching. Proc Natl Acad Sci U S A 101: 15428–15433.
  75. Odegard VH, Kim ST, Anderson SM, Shlomchik MJ, Schatz DG (2005) Histone modifications associated with somatic hypermutation. Immunity 23: 101–110.
  76. Wang L, Whang N, Wuerffel R, Kenter A (2006) AID-dependent histone acetylation is detected in immunoglobulin S regions. J Exp Med 203: 215–226.
  77. Seo H, Masuoka M, Murofushi H, Takeda S, Shibata T, et al. (2005) Rapid generation of specific antibodies by enhanced homologous recombination. Nat Biotechnol 23: 731–735.
  78. Stankiewicz P, Lupski JR (2002) Genome architecture, rearrangements and genomic disorders. Trends Genet 18: 74–82.
  79. Batzer MA, Deininger PL (2002) Alu repeats and human genomic diversity. Nat Rev Genet 3: 370–379.
  80. Aplan PD (2006) Causes of oncogenic chromosomal translocation. Trends Genet 22: 46–55.
  81. Martens JH, O'Sullivan RJ, Braunschweig U, Opravil S, Radolf M, et al. (2005) The profile of repeat-associated histone lysine methylation states in the mouse epigenome. EMBO J 24: 800–812.
  82. Tycko B (2003) Genetic and epigenetic mosaicism in cancer precursor tissues. Ann N Y Acad Sci 983: 43–54.
  83. McMurray MA, Gottschling DE (2003) An age-induced switch to a hyper-recombinational state. Science 301: 1908–1911.
  84. Preston CR, Flores C, Engels WR (2006) Age-dependent usage of double-strand-break repair pathways. Curr Biol 16: 2009–2015.
  85. Wiktor-Brown DM, Hendricks CA, Olipitz W, Engelward BP (2006) Age-dependent accumulation of recombinant cells in the mouse pancreas revealed by in situ fluorescence imaging. Proc Natl Acad Sci U S A 103: 11862–11867.
  86. Peng JC, Karpen GH (2007) H3K9 methylation and RNA interference regulate nucleolar organization and repeated DNA stability. Nat Cell Biol 9: 25–35.
  87. Shumaker DK, Dechat T, Kohlmaier A, Adam SA, Bozovsky MR, et al. (2006) Mutant nuclear lamin A leads to progressive alterations of epigenetic control in premature aging. Proc Natl Acad Sci U S A 103: 8703–8708.
  88. Porteus MH, Connelly JP, Pruett SM (2006) A look to future directions in gene therapy research for monogenic diseases. PLoS Genet 2: e133.
  89. Larson ED, Duquette ML, Cummings WJ, Streiff RJ, Maizels N (2005) MutSalpa binds to and promotes synapsis of transcriptionally activated immunoglobulin switch regions. Curr Biol 15: 470–474.
  90. Liu Y, Maizels N (2000) Coordinated response of mammalian Rad51 and Rad52 to DNA damage. EMBO Rep 1: 85–90.
